# Supplementary material
Source: bioRxiv or medRxiv preprint supplement (https://www.biorxiv.org/highwire/filestream/130491/field_highwire_adjunct_files/6/434654-4.pdf)
Supplement: Supplementary file [file 434654-4.pdf]

1 **Table S3.** Effects of warming and precipitation treatments (fixed effects) on  $R_H$  in the  
 2 summer and the fall, using a mixed-effects model that included the fixed effect of time and  
 3 the random effect of blocks. P values for Type III sum of squares with a Satterthwaite  
 4 approximation for the degrees of freedom. Significance codes:  $P < 0.001$  '\*\*\*'.

5

|                      | <b>Sum. Sq.</b> | <b>Mean Sq.</b> | <b>num df</b> | <b>den df</b> | <b>F</b> | <b>P</b>   |
|----------------------|-----------------|-----------------|---------------|---------------|----------|------------|
| <b>Precip</b>        | 0.221           | 0.110           | 2             | 69            | 0.743    | 0.479      |
| <b>Temp</b>          | 0.293           | 0.098           | 3             | 69            | 0.657    | 0.582      |
| <b>Season</b>        | 10.310          | 10.310          | 1             | 69            | 69.366   | < 0.001*** |
| <b>Precip:Temp</b>   | 0.249           | 0.042           | 6             | 69            | 0.279    | 0.945      |
| <b>Precip:Season</b> | 0.143           | 0.072           | 2             | 69            | 0.482    | 0.620      |
| <b>Temp:Season</b>   | 0.052           | 0.173           | 3             | 69            | 0.117    | 0.950      |

6
